# Supplementary material for: Systematical Identification of the Protective Effect of Danhong Injection and BuChang NaoXinTong Capsules on Transcription Factors in Cerebral Ischemia Mice Brain
Source: Oxid Med Cell Longev. 2020 Dec 14;2020:5879852. doi: 10.1155/2020/5879852 (PMC7755463; doi:10.1155/2020/5879852)
Supplement: Supplementary Materials — Figure S1. Protective effect of different dose BNC on MCAO mice. Neurological score (A); infarct rate (B) and TTC staining of the brain (C). ∗p < 0.05, ∗∗p < 0.01, ∗∗∗p < 0.001, the model group versus the sham group; #p < 0.05, ##p < 0.01, ###p < 0.001, the BNC group or DHI group or Ginaton group versus the MCAO group. Tables S1 and S2 are the data for the manuscript. [file 5879852.f1.zip]

Archive with 3 entries (3 files):
- 5879852.f1/Figure S1.docx
- 5879852.f1/Table S1.xlsx
- 5879852.f1/Table S2.xlsx
