# Supplementary material for: Systematical Identification of the Protective Effect of Danhong Injection and BuChang NaoXinTong Capsules on Transcription Factors in Cerebral Ischemia Mice Brain
Source: Oxid Med Cell Longev. 2020 Dec 14;2020:5879852. doi: 10.1155/2020/5879852 (PMC7755463; doi:10.1155/2020/5879852)
Supplement: Supplementary Materials — Figure S1. Protective effect of different dose BNC on MCAO mice. Neurological score (A); infarct rate (B) and TTC staining of the brain (C). ∗p < 0.05, ∗∗p < 0.01, ∗∗∗p < 0.001, the model group versus the sham group; #p < 0.05, ##p < 0.01, ###p < 0.001, the BNC group or DHI group or Ginaton group versus the MCAO group. Tables S1 and S2 are the data for the manuscript. [file 5879852.f1.zip › 5879852.f1/Table S1.xlsx]

## Sheet: Sheet1
APOB
PTGER2
MEF2A
CLU
NRG1
FN1
IGF1
WT1
CD36
APOA1
CYTB
TNNI3K
UCP2
prs
LGMN
asic1
ASIC2
ADAMTS13
MPPED2
PGF
MAP3K5
STC1
PGAM1
APOA5
HIF1A
RNF146
ROS1
AKT1
HSF1
APOE
JAK2
TET2
ATP7B
CCM2
CHDS4
ATP8
CCL21
ARNTL
ACOT7
GSTM3
MT3
MYBPC3
gpr17
CTNNA1
CD4
MCI2
CPAT1
ABCD1
ABCA1
DISC1
ALDH2
CD93
SERPINA3
LDLR
TRNP1
TGFB1
CSF3
SHMT2
DUSP6
AOMS1
PROZ
NDNF
KCNE2
CAMK2A
CAMK2D
GAMT
PROS1
OLIG2
BACE1
PLG
PRNP
CXCL12
C3AR1
APOLD1
JAG1
C3
HCN2
AGT
IL20
AGTR1
GALR1
CST3
THBS1
THBD
HP
NOTCH3
TUBA1A
NPY
notch1
MPVQTL1
MPVQTL2
ICAM1
FGF2
FGB
trnF
PLAT
ADGRB1
BAK1
LMNB2
ADGRB2
ADGRB3
ADH1B
HSR
MAPK10
ADH1C
PALLD
PDCD10
NOS3
BARD1
NOS1
GAD2
MYMY1
GGA3
CASP2
OLR1
Mir503
TSN
MPVQTL3
NDRG4
GABRD
EOGT
GUCY1A3
HHT4
ASIC3
ADORA2A
LTA
LTA4H
ACTA2
nppb
CANDF1
ND6
ND5
ANIB1
GJA1
PPP1R10
GPX1
POSTN
TTR
GABRA5
PITX2
GYG2
folr1
CD40LG
PARG
PTEN
Miat
SCG2
CRP
ARL6IP6
SERPINC1
MIF
HCN1
LIF
PTGDS
CERCAM
GH1
TLR4
MTHFR
TLR2
GRIN3A
PARP1
ENPP1
F2
PCSK9
RNF213
ANKK1
ESR1
P2RX5
SLC17A7
BASP1
KRIT1
SET
LRP8
HMGCR
FOXG1
F5
F7
COL3A1
COL4A1
RHEB
ngb
MMP9
COL4A2
ATFB8
RJBS
SLC8A3
LRP1
HWE1
MMACHC
ITGB3
HAVCR1
P4HB
PLA2G7
ctsl
CECR1
SELP
VCAM1
YRDC
PYGB
AKT1S1
NDE1
CBS
F13A1
DAPK1
HYOU1
S100B
LPL
ANIB6
PDE4D
stx1a
PDGFC
GATM
SHC3
VEGFA
prkaa1
Mir320a
ESCO2
CNR1
BCL2L11
TRIM2
FABP7
YWHAB
BCL2
NTN1
PDGFRA
AGAP2
ADIPOQ
ATFB5
VHL
GBX2
DLL3
DDIT4
SORT1
S100A1
trnL1
SERPINE1
ACE
YWHAZ
SLC18A2
SLC20A2
EPHX2
GP1BA
EPO
GJA4
PAPPA
ALOX5AP
TNF
SCN1A
SIRT2
RYR2
RYR3
LMNA
SLC2A1
KCNMB1
INSIG1
KCNK2
NR1H4
CKB
PRKCH
ASPM
PRKCE
GRIN1
DMBT1
GRIN2A
hba1
GRIN2B
SOD1
CLIC4
ZNF354A
KDR
SLC1A2
SLC1A3
ABCC8
TNFRSF1B
PARK2
TNFRSF1A
PSMA6
cyp2c19
HBB
IL10
MIR34A
SLC25A14
TRPA1
BEX4
TREX1
dlg4
MAPKAPK2
PSEN1
SLC6A8
AQP4
PSAP
BNIP3
SLC6A11
CCCSX
ABCC6
HTRA1
ar
CFH
CKBE
EGLN1
GLDC
APIP
MPPED1
APP
SCN2A
CDK5
HMOX1
KCNJ8
SCN3A
FSTL1
SELENOS
KCNJ11
AQP1
SREBF1
IL4
QARS
MPL
TGFB2
IL10
TGFB3
JAK2
TGFBR1
SLC2A10
TGFBR2
IL12A
IL12B
COL5A1
MFAP5
LIMK1
MYH7
MYH11
FBN1
GTF2I
PRTN3
THPO
ZMPSTE24
GLA
PIGA
MYLK
COX1
COX2
MLX
COX3
HLA-B
SH2B3
CLIP2
ERAP1
PIK3CA
CALR
HLA-DPB1
IL12A-AS1
LOX
SMARCAL1
ND1
ND4
ACTA2
SCNN1B
SCNN1G
IKBKG
BAZ1B
UBAC2
CCR1
PTPN22
GCDH
C4A
TRNH
CTLA4
ELN
PRKG1
TRNQ
ACVRL1
RFC2
TRNS1
TRNS2
GTF2IRD1
GDF2
TRNW
FAS
ENG
KLRC4
TBL2
MEFV
IL23R
TP53
STAT4
SMAD3
SMAD4
FOXE3
TGFB2
SMAD3
PRKG1
FOXE3
ACVRL1
